# Supplementary material for: Seroprevalence of Plasmodium vivax Circumsporozoite Protein Antibody in High-Risk Malaria Areas in Korea
Source: PubMed Central journal article supplement — Korean J Parasitol. 2021 Aug 18;59(4):415–9. doi: 10.3347/kjp.2021.59.4.415 (PMC8413862; doi:10.3347/kjp.2021.59.4.415), 2021-08-18
Supplement: kjp-59-4-415-suppl2.pdf [file kjp-59-4-415-suppl2.pdf]

**Supplementary Table S1.** Positive rate of circumsporozoite protein and annual parasite incidence in Goseong-gun and Paju-si

| Area    | No. of sera tested |      | No. of positive sera |      | Positive rate (%) |      | API   |       |
|---------|--------------------|------|----------------------|------|-------------------|------|-------|-------|
|         | 2017               | 2018 | 2017                 | 2018 | 2017              | 2018 | 2017  | 2018  |
| Paju    | 0                  | 308  | 0                    | 12   | 0                 | 4.00 | 13.12 | 15.96 |
| Goseong | 0                  | 304  | 0                    | 6    | 0                 | 1.97 | 0     | 0     |
| Total   | 0                  | 612  | 0                    | 18   | 0                 | 2.94 | 6.56  | 7.00  |
