# Supplementary figures and images for: Seroprevalence of Plasmodium vivax Circumsporozoite Protein Antibody in High-Risk Malaria Areas in Korea
Source: PubMed Central journal article supplement — Korean J Parasitol. 2021 Aug 18;59(4):415–9. doi: 10.3347/kjp.2021.59.4.415 (PMC8413862; doi:10.3347/kjp.2021.59.4.415), 2021-08-18

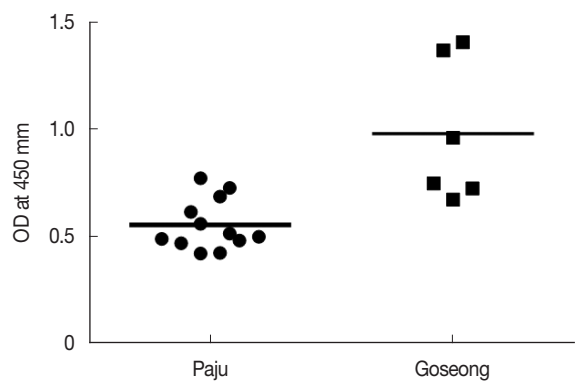

**Supplementary Fig. S1.** Anti-CSP-antibody titers for Paju and Goseong in 2018.

Supplement: kjp-59-4-415-suppl1.pdf [file kjp-59-4-415-suppl1.pdf]
